# Supplementary material
Source: PubMed Central journal article supplement (PMC4442582)
Supplement: Supp_Figure1.pdf [file Supp_Figure1.pdf]

## Supplementary Data

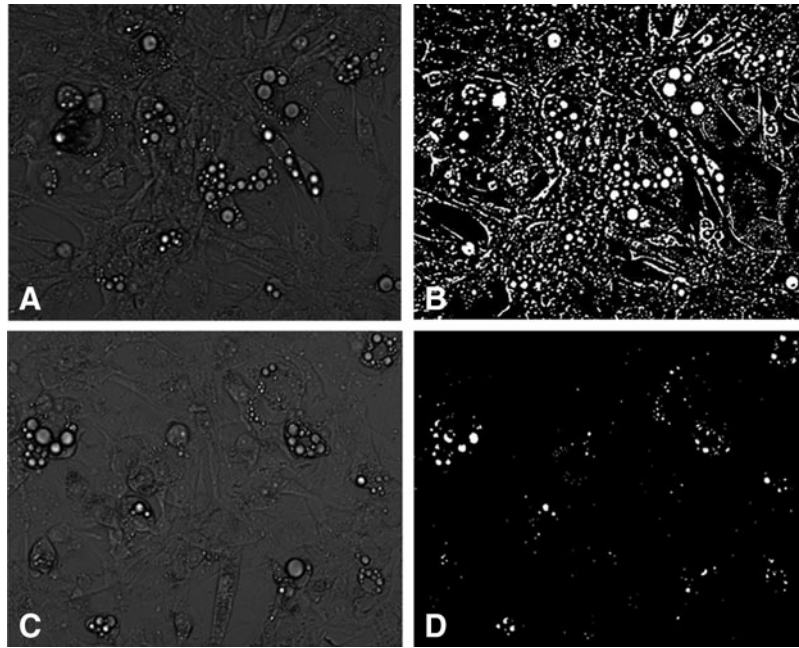

**SUPPLEMENTARY FIG. S1.** Representative grayscale images (A, C) processed with a fixed threshold (B, D). (A, B) If the threshold is too high, most of the lipid droplets (LDs) are included along with noise. (C, D) If the threshold is too low, many of the droplets may be missed.
