# Supplementary material
Source: PubMed Central journal article supplement (PMC4442582)
Supplement: Supp_Figure3.pdf [file Supp_Figure3.pdf]

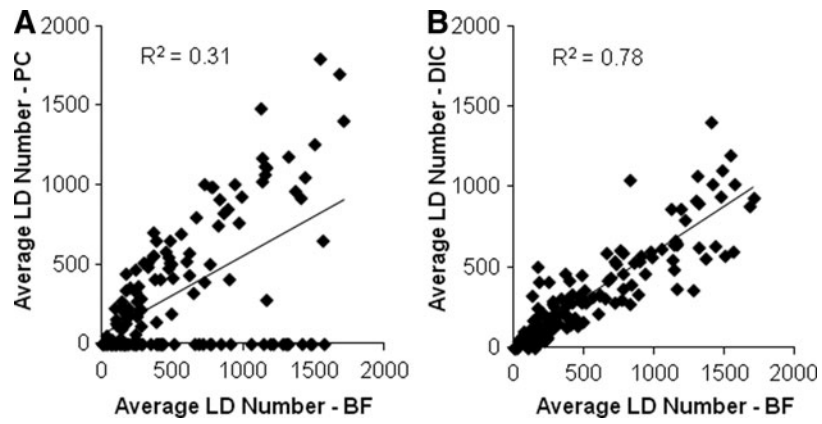

**SUPPLEMENTARY FIG. S3.** Plots of LD numbers estimated from (A) phase-contrast (PC) and (B) differential interference contrast (DIC) images compared with LD numbers from bright-field (BF) images. Each data point represents the average number of LDs calculated for a  $5 \times 5$  block of images, captured at different time points (days 4, 8, 12, and 16). Averaging was performed by dividing the total number of LDs detected in the block by the number of images.<sup>25</sup>
