# Supplementary material
Source: PubMed Central journal article supplement (PMC4442582)
Supplement: Supp_Figure4.pdf [file Supp_Figure4.pdf]

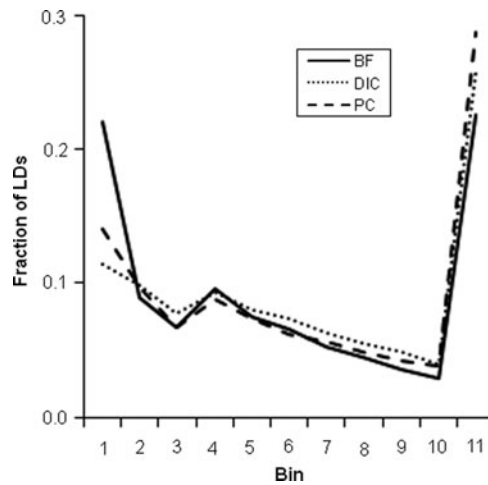

**SUPPLEMENTARY FIG. S4.** Droplet size distribution analyzed from BF, DIC, and PC images captured of the same cells in a  $20 \times 15$  block of images. Data shown are for day 16. The analysis was performed for all time points. For each time point, the droplet size distribution was computed as follows. First, the number of LDs in each size bin was summed across all images. Then, the sum for each bin was divided with the total number of LDs across all bins to calculate the fraction of LDs in each bin. The BF, DIC, and PC distributions were not found to have statistically significant differences based on the Kolmogorov–Smirnov test ( $p=0.01$ ).
