# Supplementary material
Source: PubMed Central journal article supplement (PMC4442582)
Supplement: Supp_Figure5.pdf [file Supp_Figure5.pdf]

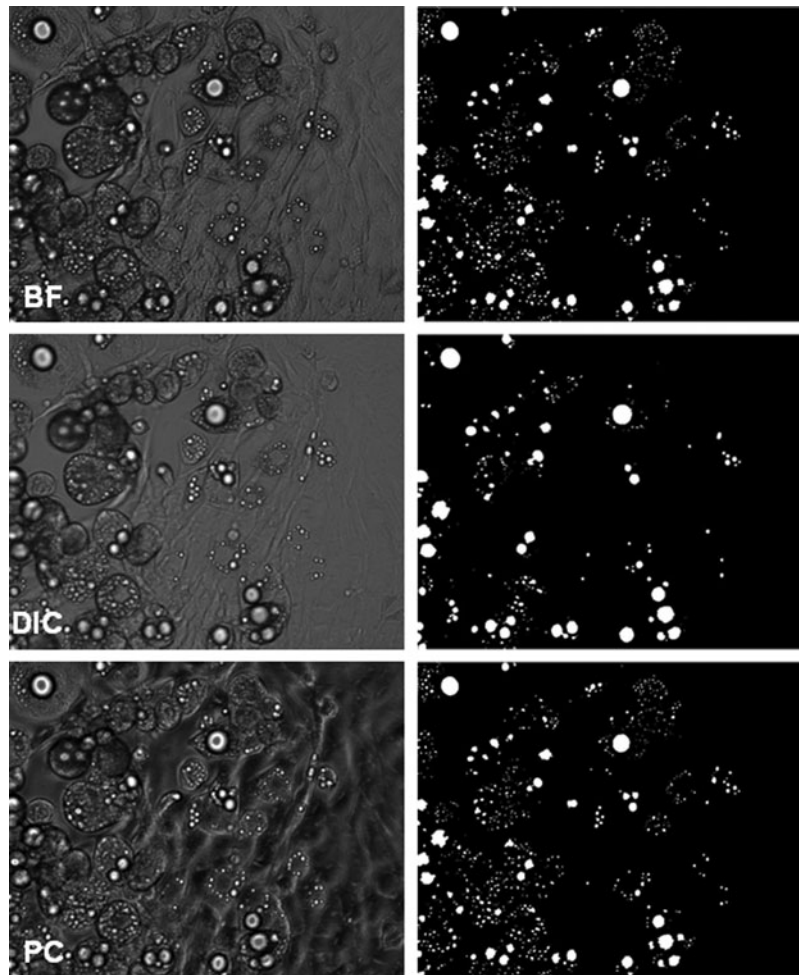

**SUPPLEMENTARY FIG. S5.** A representative set of BF, DIC, and PC images that yielded comparable results for LD analysis (*left column*, grayscale image; *right column*, processed image). The number of LDs identified was 833, 268 and 1153 for BF, DIC, and PC images, respectively. Although many of the smaller droplets were missed in the DIC image, the total lipid volumes were comparable (972,000 for BF, 1,279,000 for DIC, and 1,281,000 cubic pixels for PC). The distributions were not found to have statistically significant differences.
